# Supplementary material for: Synthesis and mechanism studies of novel drum-like Cd(OH)2 superstructures
Source: Royal Society of Chemistry journal article supplement (doi:10.1039/c1cc10382b), 2011-01-01
Supplement: c1cc10382b.pdf [file c1cc10382b.pdf]

## Electronic Supplementary Information (ESI)

### Synthesis and Mechanism Studies of Novel Drum-like Cd(OH)<sub>2</sub> Superstructures

Jingzhou Yin, Feng Gao\*, Jianjun Wang, Qingyi Lu\*

#### Experimental:

In a typical synthesis, 0.23 g of CdCl<sub>2</sub>·2.5H<sub>2</sub>O (analytically pure) was dissolved in 13 mL of deionized water with magnetic stirring, followed by the addition of 2.0 mL ammonia solution (25 %, analytically pure). Then, 5 mL of 2.8 g/L CMC (300-800 mPa·S, chemically pure) aqueous solution was dropwised into the solution containing cadmium chloride and ammonia. After 5 min stirring, the mixture was transferred to and sealed in a 50 mL Teflon-lined autoclave, kept at 80 °C for 4 h, and finally cooled to room temperature. The precipitate was collected by centrifugation (4 000 rpm, 3 min), washed alternately with deionized water and ethanol, and dried in air. The conversion of the as-prepared drum-like Cd(OH)<sub>2</sub> superstructures to CdO superstructures was carried out in an oven in air at 350 °C for 4 h.

*Characterizations:* Powder X-ray diffraction (XRD) measurements were performed on a SHIMADZU XRD-6000 X-ray diffractometer at Cu K<sub>α</sub> radiation with 40 kV beam voltage and 30 mA beam current. The data were collected in the 10 ~ 70 ° range (2θ) with steps of 0.02 °. Scanning electron microscopy (SEM) images were obtained with a Hitachi S-4800 field-emission microscope. Transmission electron microscopy (TEM), High-resolution TEM (HRTEM) images and the corresponding selected area electron diffraction (SAED) pattern are captured on the JEM-2100 instrument microscopy at an acceleration voltage of 200 kV. The catalytic roles of Cd(OH)<sub>2</sub> and CdO in the thermal decomposition of AP were studied by differential scanning calorimeter (DSC) using STA 449C thermal analyzer at a heating rate of 20 °C·min<sup>-1</sup> in N<sub>2</sub> atmosphere over the temperature range of 20 - 500 °C. The mass percentage of Cd(OH)<sub>2</sub> or CdO to AP in the mixture is fixed at 2 %.

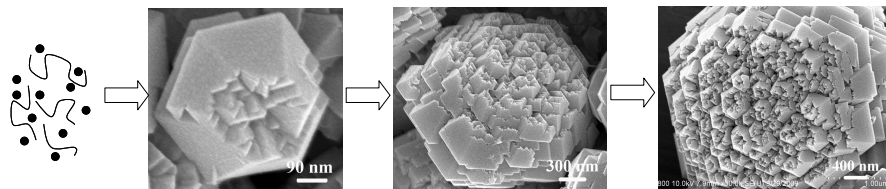

Scheme S11 Growth mechanism of the novel drum-like  $\text{Cd}(\text{OH})_2$  structures

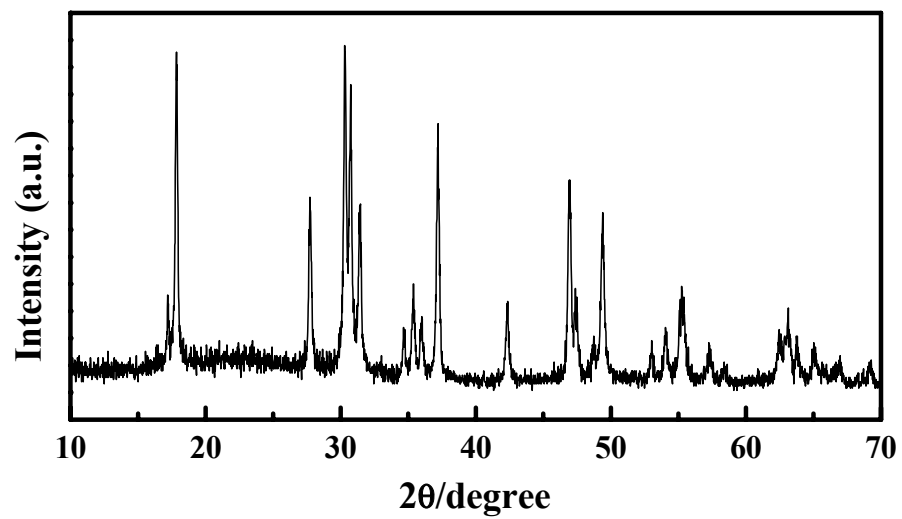

Figure S11 XRD pattern of the sample prepared at 80 °C for 4 h

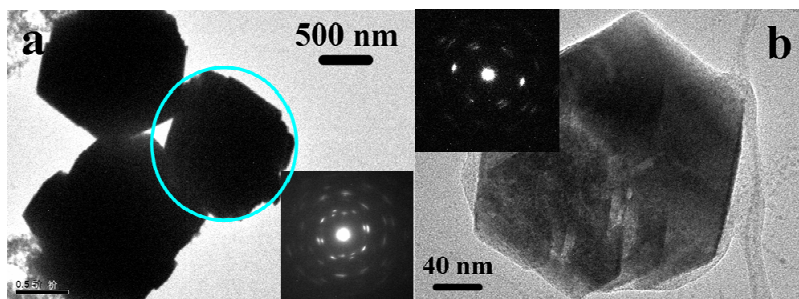

Fig. S12 TEM image and SAED pattern of the as-synthesized sample.

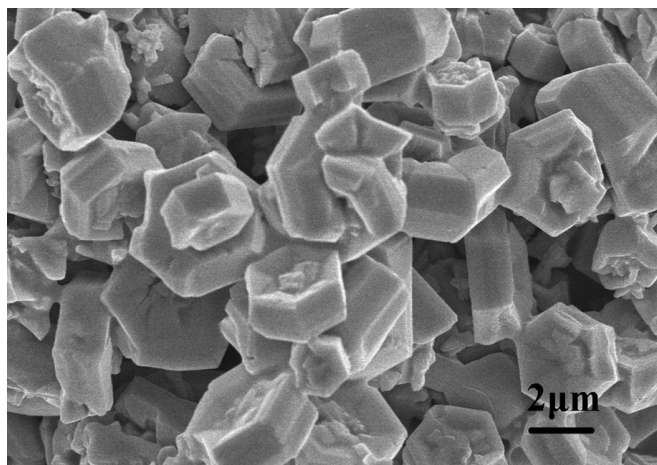

Fig. S13 An SEM image of the Cd(OH)<sub>2</sub> sample prepared without the addition of CMC solution.

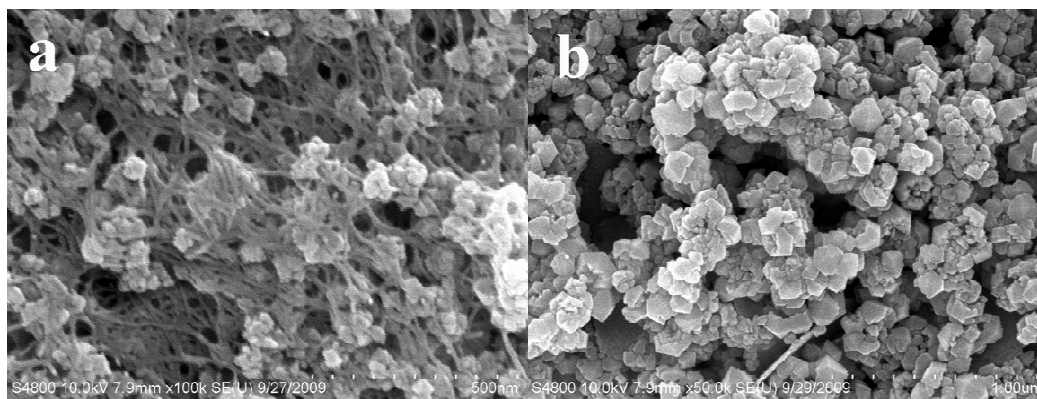

Fig. S14 SEM images of the Cd(OH)<sub>2</sub> samples obtained at 80 °C with (a) 0.8 ml; (b) 1.2 ml ammonia solution.

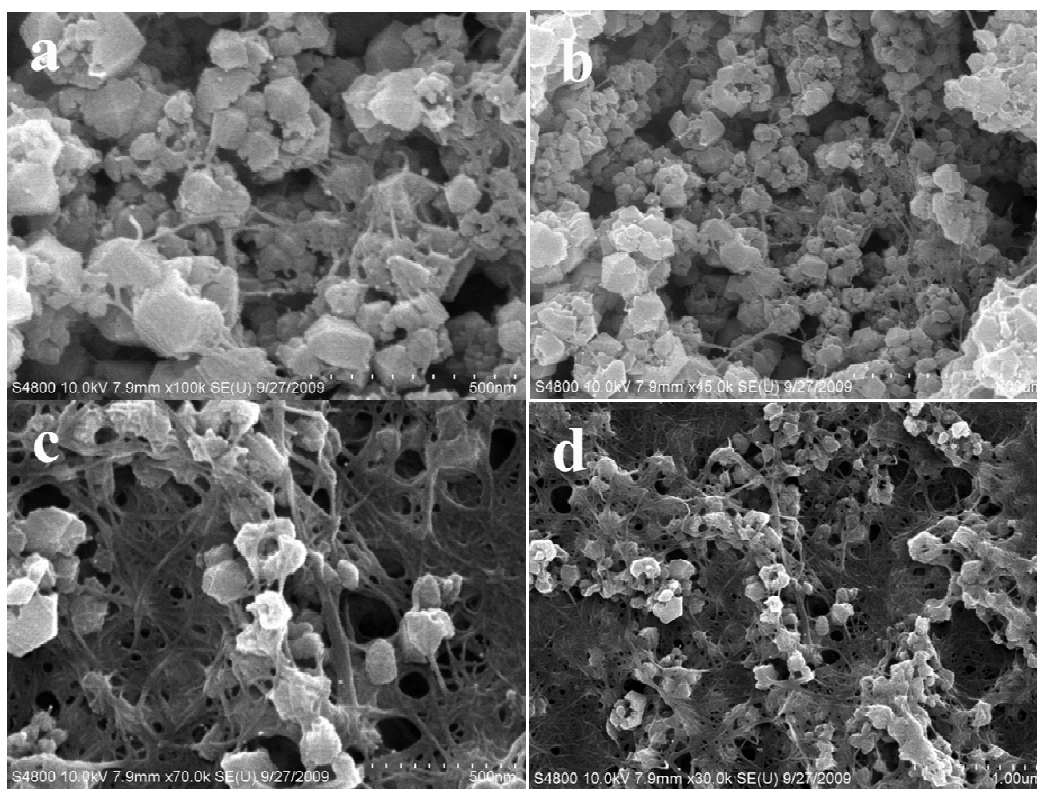

Fig. S15 SEM images of the Cd(OH)<sub>2</sub> samples prepared at different temperatures (a, b) 120 °C; (c, d) 160 °C.

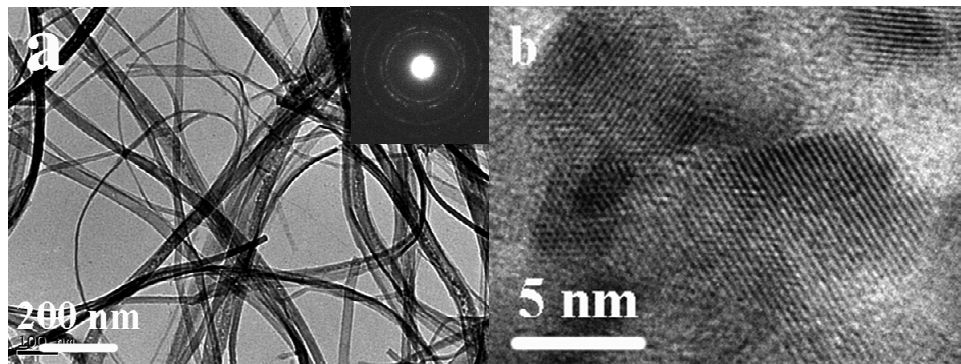

Fig. SI6 The TEM image, SAED pattern and HRTEM image of the  $\text{Cd}(\text{OH})_2$  nanowires obtained at 200 °C

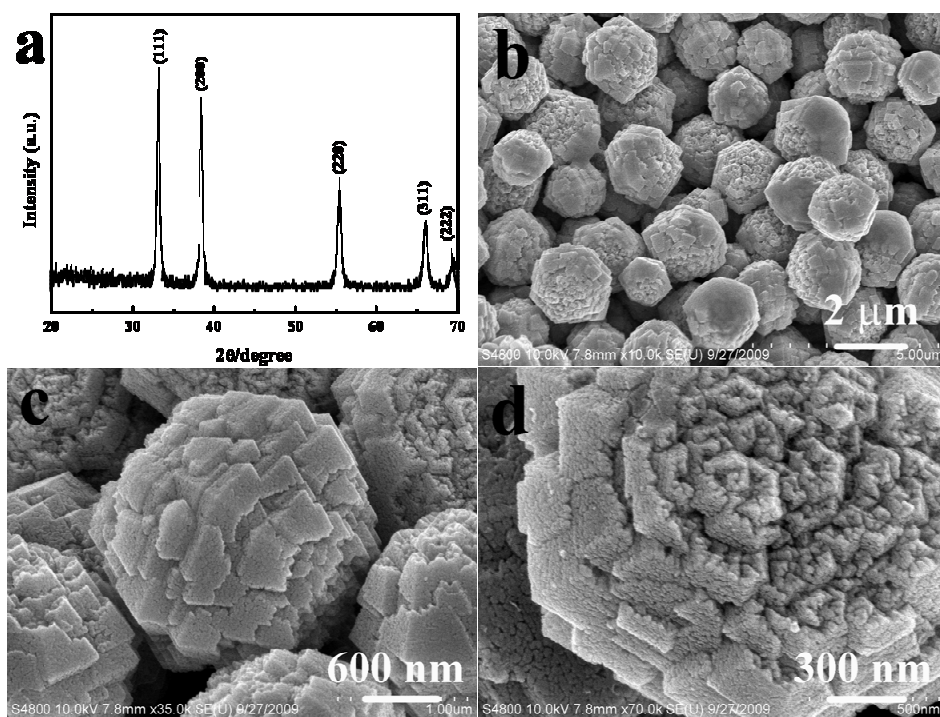

Fig. SI7 XRD pattern and SEM images of drum-like CdO superstructures.

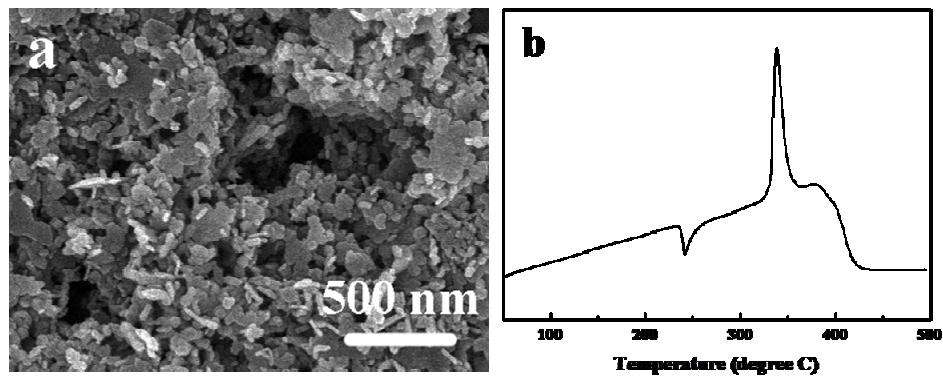

Fig. SI8 (a) an SEM image of  $\text{Cd}(\text{OH})_2$  nanoplates and (b) DSC curves of the mixture of AP and  $\text{Cd}(\text{OH})_2$  nanoplates.
